# Supplementary material
Source: PubMed Central journal article supplement (PMC3445756)
Supplement: NIHMS401222-supplement-01.pdf [file NIHMS401222-supplement-01.pdf]

**Table SI.** Plasmids used and generated in this study

| <b>Plasmid</b> | <b>Description</b>                               | <b>Source</b>     |
|----------------|--------------------------------------------------|-------------------|
| pPS1152        | <i>NPL3, URA3, Amp<sup>R</sup>, 2μ</i>           | Lee et al, 96 [1] |
| pAM420         | <i>GFP-npl3-RK1-15, pGal. URA3, AmpR, 2μ</i>     | McBride, 05 [2]   |
| pPS879         | <i>GFP-npl3 F160L, URA3, Amp<sup>R</sup>, 2μ</i> | Lee et al, 96 [1] |
| pBS0A1         | hnRNP A1-GFP                                     | Zhu, 02 [3]       |
| pJL215         | pRS316 with <i>NPL3</i> promoter                 | This study        |
| pJL226         | hnRNP A1-6xHis                                   | This study        |
| pJL227         | <i>NPL3</i> -6xHis                               | This study        |
| pJL228         | <i>npl3</i> -F160L-6xHis                         | This study        |
| pJL229         | <i>npl3</i> -RK1-15-6xHis                        | This study        |
| pJL230         | <i>npl3</i> -F160L L225S G241N E244K-6xHis       | This study        |
| pJL231         | <i>npl3</i> -L225S G241N E244K-6xHis             | This study        |

**References:**

- [1] M. S. Lee, M. Henry and P. A. Silver, A protein that shuttles between the nucleus and the cytoplasm is an important mediator of RNA export, *Genes Dev* 10 (1996) 1233-1246.
- [2] A. E. McBride, J. T. Cook, E. A. Stemmler, et al., Arginine methylation of yeast mRNA-binding protein Npl3 directly affects its function, nuclear export, and intranuclear protein interactions, *J Biol Chem* 280 (2005) 30888-30898.
- [3] D. Zhu, G. Xu, S. Ghandhi, et al., Modulation of the expression of p16INK4a and p14ARF by hnRNP A1 and A2 RNA binding proteins: implications for cellular senescence, *J Cell Physiol* 193 (2002) 19-25.





Figure S2

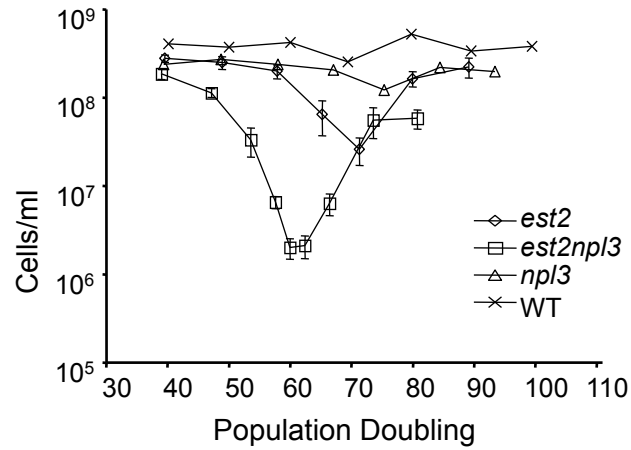

**Figure S2. Deletion of *NPL3* accelerated the senescence of *est2* mutants.** *est2::URA3* (from Open Biosystems) and *npl3::Kan<sup>R</sup>* diploids were mated to generate yJL340 diploid cells. After sporulation and dissection, haploid cells were maintained in YPAD for the senescence assay. Population doublings were determined daily for 2x10<sup>6</sup> cells after 22 hours of growth. Error bars for represent standard error of the mean,  $N = 5$  for *est2* and *est2 npl3* mutants and  $N = 2$  for WT and *npl3* cells.

Figure S3

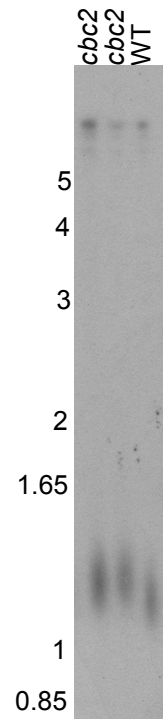

**Figure S3.** At steady state, *cbc2* mutants have longer telomeres than WT cells. DNA from *cbc2* and *CBC2* cells were extracted, digested, separated on gel, and blotted. Telomere fragments (indicated by bracket) were hybridized with  $^{32}\text{P}$  labeled 784 bp PCR-generated Y' fragment. Ladder marker (in kb) is indicated on the left.
